# Supplementary material for: Two-year outcomes following a randomised platelet transfusion trial in preterm infants
Source: Arch Dis Child Fetal Neonatal Ed. 2023 Feb 21;108(5):452–7. doi: 10.1136/archdischild-2022-324915 (PMC10447411; doi:10.1136/archdischild-2022-324915)
Supplement: Supplementary data [file fetalneonatal-2022-324915supp001.pdf]

**Appendix Scores from formal neurodevelopmental assessments**

| Outcome                                 | Low Threshold Group<br>(n=328)                                                                |                          | High Threshold Group<br>(n=325)                                                               |                          |
|-----------------------------------------|-----------------------------------------------------------------------------------------------|--------------------------|-----------------------------------------------------------------------------------------------|--------------------------|
|                                         | N where formal<br>assessment<br>completed (%<br>of those where<br>2yr assessment<br>required) | Median (IQR) or<br>n (%) | N where formal<br>assessment<br>completed (%<br>of those where<br>2yr assessment<br>required) | Median (IQR)<br>or n (%) |
| <b>Bayley assessment</b> <sup>(1)</sup> | 71 (28)                                                                                       |                          | 63 (27)                                                                                       |                          |
| Cognitive scaled score                  | 67 (26)                                                                                       | 10 (5-12)                | 58 (25)                                                                                       | 10 (8-11)                |
| Receptive Language scaled score         | 48 (19)                                                                                       | 9 (7-11)                 | 40 (17)                                                                                       | 7 (6-9)                  |
| Expressive Language scaled score        | 50 (20)                                                                                       | 8 (5-10)                 | 40 (17)                                                                                       | 8 (6-10)                 |
| Fine Motor scaled score                 | 63 (25)                                                                                       | 10 (5-12)                | 56 (24)                                                                                       | 10 (8-12)                |
| Gross Motor scaled score                | 61 (24)                                                                                       | 8 (6-9)                  | 56 (24)                                                                                       | 8 (6-9)                  |
| <b>Griffiths assessment</b>             | 8 (3)                                                                                         |                          | 10 (4)                                                                                        |                          |
| <b>Locomotor score</b>                  | 7 (3)                                                                                         |                          | 9 (4)                                                                                         |                          |
| > 3 <sup>rd</sup> percentile            |                                                                                               | 6 (86)                   |                                                                                               | 5 (56)                   |
| ≤ 3 <sup>rd</sup> percentile            |                                                                                               | 1 (14)                   |                                                                                               | 4 (44)                   |
| <b>Personal and Social score</b>        | 8 (3)                                                                                         |                          | 8 (3)                                                                                         |                          |
| > 3 <sup>rd</sup> percentile            |                                                                                               | 6 (75)                   |                                                                                               | 6 (75)                   |
| ≤ 3 <sup>rd</sup> percentile            |                                                                                               | 2 (25)                   |                                                                                               | 2 (25)                   |
| <b>Hearing and Language score</b>       | 7 (3)                                                                                         |                          | 8 (3)                                                                                         |                          |
| > 3 <sup>rd</sup> percentile            |                                                                                               | 5 (71)                   |                                                                                               | 6 (75)                   |
| ≤ 3 <sup>rd</sup> percentile            |                                                                                               | 2 (29)                   |                                                                                               | 2 (25)                   |
| <b>Eye and Hand Coordination score</b>  | 7 (3)                                                                                         |                          | 9 (4)                                                                                         |                          |
| > 3 <sup>rd</sup> percentile            |                                                                                               | 6 (86)                   |                                                                                               | 6 (67)                   |
| ≤ 3 <sup>rd</sup> percentile            |                                                                                               | 1 (14)                   |                                                                                               | 3 (33)                   |
| <b>Performance score</b>                | 7 (3)                                                                                         |                          | 9 (4)                                                                                         |                          |
| > 3 <sup>rd</sup> percentile            |                                                                                               | 5 (71)                   |                                                                                               | 5 (56)                   |
| ≤ 3 <sup>rd</sup> percentile            |                                                                                               | 2 (29)                   |                                                                                               | 4 (44)                   |

<sup>(1)</sup> 8 participants completed a Bayley assessment, but their corrected age was less than 18 months, greater than 36 months, or missing, and so their Bayley assessment was not included in the analysis.
